# Supplementary material
Source: publisher figshare collection journal article supplement (https://adisjournals.figshare.com/ndownloader/files/29084229)
Supplement: Supplementary file 1 [file 29084229]

## Self-Reported Weather Sensitivity is Associated with Clinical Symptoms and Structural Abnormalities in Patients with Knee Osteoarthritis: A Cross-Sectional Study

Xue, Y., Chen, Y., Jiang, D. et al. Rheumatol Ther (2021). <https://doi.org/10.1007/s40744-021-00340-w>

### Study location

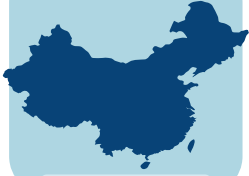

China

### Indication

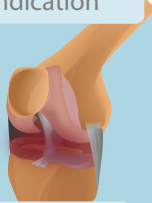

Knee OA

### Questionnaire

**Question 1:** Does the weather affect the statue of your knees?

- a. It has a lot of influence
- b. It has some effects
- c. No, it's not related to weather

**Question 2:** What weather conditions have the greatest impact on your knees?

- a. When the weather gets warmer
- b. When the weather gets cold
- c. It's hard to say

**Question 3:** Did weather changes prevent you from carrying out your normal daily activities at any time?

- a. Yes, once
- b. Yes, more often
- c. No, never

### Study population

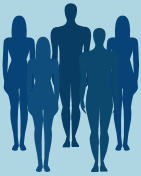

80 participants

### Study design

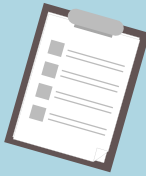

Cross-sectional survey

### Inclusion criteria

- Age > 38 years
- Knee OA per ACR criteria
- KL radiological grade 2
- VAS pain score ≥ 10 mm (0 mm = no pain, 100 mm = most severe pain)

### Why carry out this study?

People with knee OA frequently report that their clinical symptoms—including pain, stiffness, and disability—are **sensitive to weather**.

OA is a **complex disease** for which subjective weather sensitivity has not been fully investigated.

This study was conducted to determine whether **self-reported weather sensitivity** was associated with **clinical symptoms** and **structural abnormalities** in patients with knee OA via a cross-sectional survey.

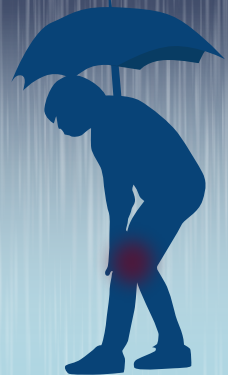

### What was learned from the study?

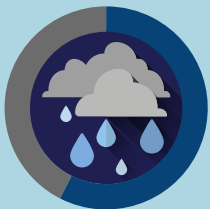

**57.5%**  
of participants reported weather sensitivity

After adjusting for age, sex, and BMI, weather sensitivity was associated with:

#### Clinical symptoms

Knee pain  
Dysfunction  
Overall clinical symptoms

#### Structural abnormalities

Cartilage defects  
Marrow abnormality

A longitudinal study is warranted to determine whether causal relationships exist.

**Abbreviations:** OA = Osteoarthritis; ACR = American College of Rheumatology; KL = Kellgren-Lawrence; VAS = Visual analogue scale; BMI = body mass index
